1 **Metformin Suppresses SARS-CoV-2 in Cell Culture**

2

3 Haripriya Parthasarathy<sup>1</sup>, Dixit Tandel<sup>1,2</sup>, and Krishnan H. Harshan<sup>1,2,€</sup>

4

5 <sup>1</sup>CSIR-Centre for Cellular and Molecular Biology, Hyderabad, India 500007

6 <sup>2</sup>Academy for Scientific and Innovative Research (AcSIR), Ghaziabad-201002, India

7

8 €Correspondence: [hkrishnan@ccmb.res.in](mailto:hkrishnan@ccmb.res.in)

9

10 **Keywords**

11 SARS-CoV-2, COVID-19, anti-viral activity, Metformin, AMPK, Diabetes

12

13

14

## 15 **ABSTRACT**

16 People with diabetes are reported to have a higher risk of experiencing severe  
17 COVID-19 complications. Metformin, a first-line medication for type 2 diabetes, has  
18 antiviral properties. Some studies have indicated its prognostic potential in COVID-  
19 19. Here, we report that metformin significantly inhibits SARS-CoV-2 growth in cell  
20 culture models. SARS-CoV-2 infection of gut epithelial cell line, Caco2, resulted in  
21 higher phosphorylation of AMPK. Metformin reduced viral titers in the infected cells  
22 by nearly 99%, and by about 90% when cells were treated prior to infection.  
23 Metformin pre-treatment resulted in further phosphorylation of AMPK and caused a  
24 ten-fold reduction of viral titers indicating its potential in preventing naïve infections.  
25 Confirming the positive impact of AMPK activation, another AMPK activator AICAR  
26 substantially inhibited of viral titers and, AMPK inhibitor Compound C, augmented it  
27 considerably. Metformin treatment post-SARS-CoV-2 infection resulted in nearly  
28 hundred-fold reduction of viral titers, indicating that the antiviral potency of the drug  
29 is far higher in infected cells, while still being able to reduce fresh infection.  
30 Metformin displayed SARS-CoV-2 TCID<sub>50</sub> and TCID<sub>90</sub> at 3.5 and 8.9 mM,  
31 respectively. In conclusion, our study demonstrates that metformin is very effective in  
32 limiting the replication of SARS-CoV-2 in cell culture and thus possibly could offer  
33 double benefits to diabetic COVID-19 patients by lowering both blood glucose levels  
34 and viral load.

## 35 **INTRODUCTION**

36 As the COVID-19 pandemic still rages on in most parts of the world, countries are  
37 racing to get their citizens fully vaccinated. While the vaccines are effective in most  
38 cases, emergence of newer variants of the causative agent, SARS-CoV-2, is a

39 cause for concern (Bernal et al., 2021). Particularly vulnerable to COVID-19 are  
40 patients with comorbidities such as cancer, auto-immune diseases, cardiovascular  
41 conditions, and diabetes. The hospitalization rate for patients with comorbidities who  
42 contracted COVID-19 was significantly higher during the first wave of the pandemic,  
43 associated with poor prognosis (Sanyaolu et al., 2020). Type 2 diabetes, one of the  
44 most common metabolic disorders, is universally treated using insulin and a number  
45 of other drugs, chiefly metformin (Davidson & Peters, 1997). Metformin is a  
46 biguanide compound, used as first-line antidiabetic medication worldwide. It acts  
47 primarily by increasing glucose intake and limiting gluconeogenesis in the liver, and  
48 its action is mediated in part by the energy-sensing kinase, 5'-AMP-activated protein  
49 kinase (AMPK) (Zhou et al., 2001). Metformin inhibits Complex I of the electron  
50 transport chain and suppresses ATP synthesis, which triggers AMPK activation. This  
51 results in a cascade of events that decreases anabolic processes and initiates  
52 macromolecular breakdown to reinstate homeostasis.

53 In the past year, a number of reports have debated the clinical use of metformin in  
54 COVID-19 (Bramante et al., 2021; Dardano & del Prato, 2021; Ibrahim et al., 2021;  
55 Zangiabadian et al., 2021). Many case studies on metformin treatment report a  
56 decrease in hospital mortality rates for patients that were on metformin prior to  
57 admission (Dardano & del Prato, 2021; L et al., 2020; Marmor et al., 2021). Reports  
58 suggest that high glucose levels are associated with poorer prognosis and well-  
59 controlled glucose levels were indicative of lesser complications (L et al., 2020).  
60 Metformin has also been reported to show anti-viral activity against other viruses (X.  
61 Chen et al., 2020). In this study, we aimed to investigate the effect of metformin on  
62 SARS-CoV-2, and identify the effects of AMPK perturbation on infection. Pre-  
63 treatment of cells with metformin prior to infection substantially lowered the viral titer.

64 Pharmacological activation of AMPK suppressed viral infection while its inhibition  
65 promoted it. Treatment of SARS-CoV-2 infected cells with metformin resulted in  
66 stronger restriction of the virus in a dose-dependent manner, as compared to the  
67 pre-treatment. Our results support the promising use of metformin as a therapeutic  
68 drug in COVID-19.

## 69 **MATERIALS AND METHODS**

### 70 **Cell culture and reagents**

71 Caco2, Huh7, and Vero cells were grown in DMEM supplemented with FBS, and  
72 Pen Strep, at 37°C and 5% CO<sub>2</sub>. Anti-AMPK $\alpha$  antibody was procured from CST.  
73 GAPDH,  $\beta$ -tubulin, and anti-Nucleocapsid antibodies were from ThermoFisher  
74 Scientific. HRP-conjugated secondary antibodies were purchased from Jackson  
75 ImmunoResearch. Metformin, AICAR, and Compound C were procured from Merck  
76 Millipore.

### 77 **Infections and treatments**

78 All experiments involving virus culture were carried out in the biosafety level-3  
79 laboratory at the Centre for Cellular and Molecular Biology (CCMB). SARS-CoV-2  
80 strain B.1.1.8 (TG-CCMB-L1021/2020 isolate) was used for all experiments (Gupta  
81 et al., 2021) at 1 MOI. Cells were grown to 80% confluency and treated as  
82 described. For pre-treatments, cells were subjected to 10 mM metformin or 1 mM  
83 AICAR for 24 h, followed by infection with SARS-CoV-2 in serum-free medium (SFM)  
84 for 3 h in the presence of the respective compound. The inoculum was subsequently  
85 replaced with complete medium containing the compound and the cells were  
86 harvested at 24 h post-infection (hpi). In post-infection mode, the cells were first  
87 infected for 3 h after which the inoculum was replaced by media containing  
88 metformin and further incubated until 24 hpi. Dose-dependent effect of metformin

89 was studied by subjecting cells to varying doses of metformin (5, 10, 20, and 40 mM)  
90 similar to the post-treatment regimen mentioned above. Compound C treatment was  
91 carried out by infecting cells for 3 h at 1 MOI, complete media for 21 h, and then an  
92 additional 24 h with 10  $\mu$ M Compound C. For all treatments, media supernatant was  
93 collected to measure extracellular viral RNA as well as infectious viral titres, and  
94 cells were processed for immunoblotting.

### 95 **Virus quantification and titration**

96 RNA from viral supernatants was isolated using Nucleospin Viral RNA isolation kit  
97 (Macherey-Nagel GmbH & Co. KG). qRT-PCR was carried out using nCOV-19 RT-  
98 PCR detection kit from Q-line Molecular to quantify SARS-CoV-2 RNA following  
99 manufacturer's protocol on Roche LightCycler 480.

100 Infectious titres of the supernatants were calculated using plaque forming assay  
101 (PFU/mL) as mentioned previously (Gupta et al., 2021). Briefly, the supernatant was  
102 serially diluted from  $10^{-1}$  to  $10^{-7}$  in SFM and added to a confluent monolayer of Vero  
103 cells for infection for 3 h. The medium was then replaced with a 1:1 mixture of  
104 agarose: 2  $\times$  DMEM (1% low-melting agarose (LMA) containing a final concentration  
105 of 5% FBS and 1  $\times$  Pen-Strep). Six days post-infection, cells were fixed in 4%  
106 formaldehyde prepared in 1 $\times$  PBS and subsequently washed and stained with 0.1%  
107 crystal violet to count the plaques.

### 108 **Immunoblotting**

109 Protein pellets were lysed in an NP-40 lysis buffer as described earlier (Gupta et al.,  
110 2021). Protein quantification was done using BCA method (G Biosciences). Lysates  
111 were then mixed with 6  $\times$  Laemmli buffer, and equal amounts of protein were run on  
112 SDS-PAGE, followed by transfer onto PVDF membrane. Blots were blocked in 5%

113 BSA and incubated with specific primary antibodies at 4°C overnight. Incubation with  
114 HRP-conjugated secondary antibodies was done for 1 hour and the blots were  
115 developed on a BioRad Chemidoc MP system using ECL reagents (ThermoFisher  
116 and G Biosciences). Quantification was performed using ImageJ (Schneider et al.,  
117 2012).

### 118 **Cell viability assay**

119 Effect of different doses of metformin on viability of mock and infected Caco2 cells  
120 was measured using MTT assay. Cells were subjected to varied doses of metformin  
121 as mentioned in the previous section. After incubation, media containing 0.5 mg/mL  
122 MTT was added to cells and incubated at 37°C for 3.5 h. Formazan crystals were  
123 dissolved in 100 µL DMSO and incubated for 30 min with mild agitation. Viability was  
124 read as absorbance measured at 570 nm, with a reference reading at 620 nm.

### 125 **Statistical analysis**

126 All experiments were performed in triplicate to calculate mean  $\pm$  SEM. Statistical  
127 significance was calculated using two-tailed, unpaired Student's *t*-test and *p* values  
128 are represented as \*, \*\*, \*\*\*, indicating  $p \leq 0.05$ , 0.005, and 0.0005, respectively.  
129 IC50 and IC90 were calculated from qRT-PCR data, while TCID50 and TCID90 were  
130 calculated from PFU data from metformin titration experiments.

## 131 **RESULTS**

### 132 **SARS-CoV-2 infection causes long-term phosphorylation of AMPK**

133 Caco2 cells were infected with 1 MOI of SARS-CoV-2 for several time points and the  
134 samples were analyzed for AMPK phosphorylation. Though no significant change in  
135 the AMPK phosphorylation was detected until 48 h post-infection (hpi) (Figure 1 A  
136 and B), marked increase in phosphorylation was evident from 48 hpi that further

137 strengthened until 96 hpi, despite a drop in the abundance of the protein. These  
138 results indicated a major metabolic reprogramming, resulting in AMPK  
139 phosphorylation occurring after 24 hpi. Interestingly, AMPK phosphorylation  
140 coincided with the accumulation of viral proteins (Figure 1A).

#### 141 **Metformin protects cells from SARS-CoV-2 infection**

142 We investigated the role of AMPK activation during SARS-CoV-2 infection as  
143 previous reports have clearly established the roles played by this molecule on the  
144 outcome of viral infections (Bhutta et al., 2021). Caco2 cells were pre-treated with  
145 10mM concentration of metformin for 24 h after which they were infected with 1 MOI  
146 of SARS-CoV-2 for 3 h in presence of metformin. Subsequently, the viral media was  
147 replaced with growth medium containing metformin and incubated until 24 hpi  
148 (Figure 1C). Increased phosphorylation of AMPK in the drug-treated cells confirmed  
149 the effect of metformin (Figures 1 D and E). Metformin treatment resulted in nearly  
150 50% drop in the viral RNA (Figure 1F), and nearly one-log drop in the infectious viral  
151 titers (Figure 1G) indicating that metformin treatment is protective against SARS-  
152 CoV-2 infection. However, no prominent change in the viral protein N was observed  
153 (Figures 1 D and H), suggesting that viral translation or its stability is not negatively  
154 impacted by metformin. Metformin treatment in Huh7 cells also brought about  
155 significant reduction in the infectious viral titer of SARS-CoV-2 (Supplementary  
156 Figures S1 A-D), albeit, less pronounced than in Caco2 cells, confirming that  
157 metformin has strong protective effects against SARS-CoV-2 infection.

#### 158 **AMPK activation restricts SARS-CoV-2**

159 To further verify if the protective effect of metformin involves AMPK, we used AICAR,  
160 another activator of AMPK. Cells were pre-treated with 1mM of AICAR for 24 h as in

161 the case of metformin (Figure 2A). AICAR treatment (Figure 2B) significantly lowered  
162 the infectious viral titer of SARS-CoV-2 (Figure 2C) by almost one-log, as did  
163 metformin. These results demonstrate that AMPK activation is certainly beneficial to  
164 the host cells by significantly limiting the viral titers. We further confirmed this effect  
165 by inhibiting AMPK by using Compound C (CC) during SARS-CoV-2 infection. Since  
166 AMPK phosphorylation peaked beyond 24 h, cells were first infected at 1 MOI for 3 h  
167 followed by supplementation with growth medium. 24 hpi, media containing 10  $\mu$ M  
168 CC was added and incubated for an additional 24 h (Figure 2D). Though CC  
169 treatment caused a visible drop in AMPK phosphorylation in mock cells, there was  
170 no apparent decrease observed in infected cells, indicating that the virus-induced  
171 AMPK activation overrides CC inhibition (Figure 2 E and F). As anticipated, CC  
172 treatment resulted in over four-fold higher viral titers in the supernatants as against  
173 the control sample (Figure 2G), accompanied by a modest drop in N levels (Figure  
174 2H). CC treatment of infected Huh7 cells also resulted in substantial increase in the  
175 infectious viral titres (Supplementary Figures S2 A, B, and D), again accompanied by  
176 considerable drop in N levels (Supplementary Figure S2C). These results confirm  
177 that AMPK coordinates strong antiviral measures in SARS-CoV-2 infected cells.  
178 Thus, activation of AMPK during the infection is protective against SARS-CoV-2  
179 infection.

## 180 **Metformin treatment post-infection causes more profound restriction of SARS-** 181 **CoV-2**

182 We next tested the effect of metformin in Caco2 cells previously infected with SARS-  
183 CoV-2 to extrapolate its impact on the infected patients. Cells infected with 1 MOI of  
184 SARS-CoV-2 for 3 h were subsequently treated with 10 mM metformin until  
185 harvested at 24 hpi (Figure 3 A). Metformin caused higher AMPK phosphorylation



186 (Figures 3 B and C). In comparison with the pre-treatment regimen, the post-  
187 infection regimen caused a more profound drop in the viral RNA and nearly two log  
188 decrease of infectious titer in the supernatant (Figures 3 D and E, respectively).  
189 Interestingly, considerable drop in the levels of N was observed in the metformin  
190 treated samples (Figure 3F), further confirming the profound restrictive effect of the  
191 drug on SARS-CoV-2. In comparison, N levels were relatively unchanged in the  
192 samples pre- and co-treated with metformin and AICAR (Figures 1 D, H and 2B  
193 respectively). A higher drop in the viral titers were observed in metformin treated  
194 Huh7 cells as well (Supplementary Figures S3 A and B). These results indicate that  
195 the protection offered by metformin from SARS-CoV-2 infection is more profound in  
196 cells previously infected with SARS-CoV-2 than the uninfected cells.

197 Since post-infection regimen had a higher impact on SARS-CoV-2, we performed a  
198 dose-dependence analysis. A dose-dependent increase in AMPK phosphorylation  
199 was evident in SARS-CoV-2 infected cells from 5-40 mM metformin concentrations  
200 (Figures 4 A and B). A gradual and dose-dependent decrease in N levels was  
201 evident (Figures 4 A and C). The drop in viral RNA levels was more dramatic with a  
202 very significant drop detected even at 5 mM concentration and was further stabilized  
203 at 20 mM concentration (Figure 4D). 5 mM concentration of metformin inhibited  
204 infectious viral titers by 70% while the highest inhibition of nearly 2 logs was  
205 observed at 20 mM concentration where once again, the inhibition was stabilized  
206 (Figure 4E). The calculated IC<sub>50</sub> and IC<sub>90</sub> for viral RNA were measured to be 2.9  
207 mM and 8.8 mM respectively (Figure 4F). We also measured the TCID<sub>50</sub> and  
208 TCID<sub>90</sub> values at 3.5 mM and 8.9 mM respectively (Figure 4G). MTT experiments  
209 carried out with the different doses indicate a steady decrease in viability with

210 increasing metformin (Figure 4H). Together, these results unambiguously  
211 demonstrate a potent anti-SARS-CoV-2 effect of metformin.

## 212 **DISCUSSION**

213 The anti-diabetic drug, metformin, has been projected to influence the prognosis of  
214 COVID-19 patients. As patients with comorbidities fared worse when infected with  
215 SARS-CoV-2, management of an ongoing illness alongside COVID-19 treatment  
216 became paramount. Some studies early during the pandemic identified a positive  
217 correlation between improved glucose levels in diabetic patients on metformin and  
218 better clinical outcome (Y. Chen et al., 2020; Crouse et al., 2020; L et al., 2020; P et  
219 al., 2020). A number of reports proposed metformin as a possible “miracle or  
220 menace” in COVID-afflicted patients, based on retrospective data from  
221 hospitalisations, (Lui & Tan, 2021; Marmor et al., 2021) comparing the length of  
222 hospitalisation, severity of symptoms, or mortality. In this study, we demonstrated  
223 that metformin profoundly lowers SARS-CoV-2 infectivity. While extrapolating these  
224 results to a clinical set up may not be appropriate, our data indicate that metformin  
225 can be effective not only as a treatment option, but as a prophylactic agent as well.  
226 With this data, we suggest that treatment of patients with metformin prior to infection  
227 with SARS-CoV-2 may have assisted in decreasing their symptoms of COVID-19.  
228 Our results also suggest that metformin could be beneficial in non-diabetic, COVID-  
229 19 patients and expand the scope of its coverage. In summary, this data lies in  
230 agreement with the numerous case studies published during the pandemic that  
231 suggested an antiviral role for this known anti-diabetic drug.

232 Metformin plays a major role in modulating lipid metabolism, but the mechanisms are  
233 multi-dimensional. Metformin is a soluble compound that interferes with Complex I

234 of the electron transport chain, and the decrease in ATP production causes AMPK  
235 activation. It also decreases hepatic lipids, increases skeletal muscle uptake of  
236 glucose, and in parallel helps in decreasing circulating lipids that can eventually  
237 increase cardiovascular risk especially in diabetic adults who are obese (Pernicova &  
238 Korbonits, 2014; Rena et al., 2017). RNA viruses have an intimate relationship with  
239 the cytoplasmic membrane network and modulate lipogenesis to steer cells to  
240 produce more vesicles to aid replication, as well as packaging and release (Herker &  
241 Ott, 2012; Pereira-Dutra et al., 2019). The impairment of such activities leading to  
242 loss in infectivity has been reported for several viruses (Abu-Farha et al., 2020; X.  
243 Chen et al., 2020; CN et al., 2021). A recent report on SARS-CoV-2 highlighted the  
244 possible role that lipid droplets play in its infection (Dias et al., 2020). Not only did  
245 they observe higher colocalization of viral RNA with the lipid droplets, they also  
246 demonstrated that inhibition of its formation decreased viral load as well as pro-  
247 inflammatory cytokines and apoptosis markers. These results in conjunction with  
248 ours indicates that the anti-viral effect of metformin is probably a resultant of altered  
249 lipid metabolism.

250 We speculate that the loss in infectivity of SARS-CoV-2 by metformin could also be,  
251 an outcome of altered lipid metabolism mediated by AMPK. AMPK affects cellular  
252 lipid levels through a number of its substrates, such as ACC and SREBP1. AMPK  
253 also regulates macromolecular metabolism, mitochondrial homeostasis, autophagy  
254 as well as apoptosis. As its role is multifaceted and vital for maintaining energy  
255 levels, it has been reported to play key roles in many virus infections. Multiple reports  
256 shows that AMPK activation can be either detrimental or beneficial for virus survival  
257 and propagation (Bhutta et al., 2021). Our results using AICAR and CC in SARS-  
258 CoV-2 infection implies an unfavorable/antiviral environment for the virus when

259 AMPK is activated. In this context, it is interesting to note that N protein was detected  
260 at modestly higher abundance during pharmacological activation of AMPK unlike the  
261 viral RNA and infectious titer, indicating that viral protein translation is not inhibited  
262 during the treatments. However, a significant drop in N levels during the post-  
263 infection treatment suggested an overall inhibition of viral life-stages concurrent with  
264 an overall drop of cellular activities indicated by MTT results. Inhibition of metabolic  
265 activities particularly in the infected cells upon post-infection metformin treatment  
266 indicated that metformin treatment specifically targeted the infected cells for  
267 destruction. This could be viewed as beneficial to the system fighting to clear the  
268 virus from it.

269 Although multiple reports show AMPK as the major effector of metformin action, it is  
270 now well established that metformin exerts its affects through other pathways such  
271 as PKA and FBPase-1 mediated regulation as well (Pernicova & Korbonits, 2014).  
272 Further study into the mechanism SARS-CoV-2 inhibition by metformin could pave  
273 the way for it to be a possible therapeutic target for COVID-patients. From a clinical  
274 perspective, our study provides some answers to the favorable prognosis of  
275 metformin-treated diabetic patients who contracted COVID-19.

#### 276 **Institutional biosafety**

277 Institutional biosafety clearance was obtained for the experiments pertaining to  
278 SARS-CoV-2.

#### 279 **Author contributions**

280 H.P. performed treatments, infections, quantification and immunoblotting. D.N.  
281 performed qRT-PCR experiments. H.P. and K.H.H. conceptualized the study and  
282 wrote the manuscript.

283 **Acknowledgement**

284 We thank Divya Gupta, Vishal Sah, Sai Poojitha, and Prangya Paramita Sahoo for  
285 their help with generation of virus and for conducting experiments. We specially  
286 thank Mohan Singh Moodu and Amit Kumar for their assistance with logistics.

287 **Funding**

288 The work was supported by the internal funding from CSIR-CCMB.

289 **REFERENCES**

290 Abu-Farha, M., Thanaraj, T. A., Qaddoumi, M. G., Hashem, A., Abubaker, J., & Al-Mulla, F. (2020).

291 The Role of Lipid Metabolism in COVID-19 Virus Infection and as a Drug Target. *International*  
292 *Journal of Molecular Sciences*, 21(10). <https://doi.org/10.3390/IJMS21103544>

293 Bernal, J. L., Andrews, N., Gower, C., Gallagher, E., Simmons, R., Thelwall, S., Stowe, J., Tessier, E.,

294 Groves, N., Dabrera, G., Myers, R., Campbell, C. N. J., Amirthalingam, G., Edmunds, M.,

295 Zambon, M., Brown, K. E., Hopkins, S., Chand, M., & Ramsay, M. (2021). Effectiveness of

296 Covid-19 Vaccines against the B.1.617.2 (Delta) Variant.

297 <https://doi.org/10.1056/NEJMoa2108891>, 385(7), 585–594.

298 <https://doi.org/10.1056/NEJMoa2108891>

299 Bhutta, M. S., Gallo, E. S., & Borenstein, R. (2021). Multifaceted Role of AMPK in Viral Infections.

300 *Cells*, 10(5). <https://doi.org/10.3390/CELLS10051118>

301 Bramante, C. T., Ingraham, N. E., Murray, T. A., Marmor, S., Hovertsen, S., Gronski, J., McNeil, C.,

302 Feng, R., Guzman, G., Abdelwahab, N., King, S., Tamariz, L., Meehan, T., Pendleton, K. M.,

303 Benson, B., Vojta, D., & Tignanelli, C. J. (2021). Metformin and risk of mortality in patients

304 hospitalised with COVID-19: a retrospective cohort analysis. *The Lancet Healthy Longevity*, 2(1),

305 e34–e41. [https://doi.org/10.1016/S2666-7568\(20\)30033-7](https://doi.org/10.1016/S2666-7568(20)30033-7)

306 Chen, X., Guo, H., Qiu, L., Zhang, C., Deng, Q., & Leng, Q. (2020). Immunomodulatory and Antiviral

307 Activity of Metformin and Its Potential Implications in Treating Coronavirus Disease 2019 and

308 Lung Injury. *Frontiers in Immunology*, 0, 2056. <https://doi.org/10.3389/FIMMU.2020.02056>

- 309 Chen, Y., Yang, D., Cheng, B., Chen, J., Peng, A., Yang, C., Liu, C., Xiong, M., Deng, A., Zhang, Y.,  
310 Zheng, L., & Huang, K. (2020). Clinical Characteristics and Outcomes of Patients with Diabetes  
311 and COVID-19 in Association with Glucose-Lowering Medication. *Diabetes Care*, *43*(7), 1399–  
312 1407. <https://doi.org/10.2337/dc20-0660>
- 313 CN, F.-M., CD, C.-R., JF, O.-R., IE, M.-M., LA, D. J.-G., JE, M.-M., AM, H.-M., JM, R.-R., & RM, D. Á.  
314 (2021). The antiviral effect of metformin on zika and dengue virus infection. *Scientific Reports*,  
315 *11*(1). <https://doi.org/10.1038/S41598-021-87707-9>
- 316 Crouse, A. B., Grimes, T., Li, P., Might, M., Ovalle, F., & Shalev, A. (2020). METFORMIN USE IS  
317 ASSOCIATED WITH REDUCED MORTALITY IN A DIVERSE POPULATION WITH COVID-19  
318 AND DIABETES. *MedRxiv*, 2020.07.29.20164020. <https://doi.org/10.1101/2020.07.29.20164020>
- 319 Dardano, A., & del Prato, S. (2021). Metformin: an inexpensive and effective treatment in people with  
320 diabetes and COVID-19? *The Lancet Healthy Longevity*, *2*(1), e6–e7.  
321 [https://doi.org/10.1016/S2666-7568\(20\)30047-7](https://doi.org/10.1016/S2666-7568(20)30047-7)
- 322 Davidson, M. B., & Peters, A. L. (1997). An overview of metformin in the treatment of type 2 diabetes  
323 mellitus. In *American Journal of Medicine* (Vol. 102, Issue 1, pp. 99–110).  
324 [https://doi.org/10.1016/S0002-9343\(96\)00353-1](https://doi.org/10.1016/S0002-9343(96)00353-1)
- 325 Dias, S. S. G., Soares, V. C., Ferreira, A. C., Sacramento, C. Q., Fintelman-Rodrigues, N., Temerozo,  
326 J. R., Teixeira, L., Silva, M. A. N. da, Barreto, E., Mattos, M., Freitas, C. S. de, Azevedo-  
327 Quintanilha, I. G., Manso, P. P. A., Miranda, M. D., Siqueira, M. M., Hottz, E. D., Pão, C. R. R.,  
328 Bou-Habib, D. C., Barreto-Vieira, D. F., ... Bozza, P. T. (2020). Lipid droplets fuel SARS-CoV-2  
329 replication and production of inflammatory mediators. *PLOS Pathogens*, *16*(12), e1009127.  
330 <https://doi.org/10.1371/JOURNAL.PPAT.1009127>
- 331 Gupta, D., Parthasarathy, H., Sah, V., Tandel, D., Vedagiri, D., Reddy, S., & Harshan, K. H. (2021).  
332 Inactivation of SARS-CoV-2 by  $\beta$ -propiolactone causes aggregation of viral particles and loss of  
333 antigenic potential. *Virus Research*, *305*, 198555.  
334 <https://doi.org/10.1016/J.VIRUSRES.2021.198555>
- 335 Herker, E., & Ott, M. (2012). Emerging Role of Lipid Droplets in Host/Pathogen Interactions. *Journal*  
336 *of Biological Chemistry*, *287*(4), 2280–2287. <https://doi.org/10.1074/JBC.R111.300202>

- 337 Ibrahim, S., Lowe, J. R., Bramante, C. T., Shah, S., Klatt, N. R., Sherwood, N., Aronne, L., Puskarich,  
338 M., Tamariz, L., Palacio, A., Bomberg, E., Usher, M., King, S., Benson, B., Vojta, D., Tignanelli,  
339 C., & Ingraham, N. (2021). Metformin and Covid-19: Focused Review of Mechanisms and  
340 Current Literature Suggesting Benefit. *Frontiers in Endocrinology*, 0, 625.  
341 <https://doi.org/10.3389/FENDO.2021.587801>
- 342 L, Z., ZG, S., X, C., JJ, Q., XJ, Z., J, C., F, L., H, W., J, X., W, W., H, L., P, Z., X, S., X, C., M, X., C,  
343 Z., L, B., D, X., MM, C., ... H, L. (2020). Association of Blood Glucose Control and Outcomes in  
344 Patients with COVID-19 and Pre-existing Type 2 Diabetes. *Cell Metabolism*, 31(6), 1068-  
345 1077.e3. <https://doi.org/10.1016/J.CMET.2020.04.021>
- 346 Lui, D. T. W., & Tan, K. C. B. (2021). Is metformin a miracle or a menace in COVID-19 patients with  
347 type 2 diabetes? *Journal of Diabetes Investigation*, 12(4), 479–481.  
348 <https://doi.org/10.1111/JDI.13484>
- 349 Marmor, S., Bramante, C. T., Ingraham, N. E., Murray, T. A., Marmor, S., Hovertsen, S., Gronski, J.,  
350 Mcneil, C., Feng, R., Guzman, G., Abdelwahab, N., King, S., Tamariz, L., Meehan, T.,  
351 Pendleton, K. M., Benson, B., Vojta, D., & Tignanelli, C. J. (2021). Metformin and risk of  
352 mortality in patients hospitalised with COVID-19: a retrospective cohort analysis. *Articles Lancet*  
353 *Healthy Longev*, 2, 34–41. [https://doi.org/10.1016/S2666-7568\(20\)30033-7](https://doi.org/10.1016/S2666-7568(20)30033-7)
- 354 P, L., L, Q., Y, L., XL, L., JL, Z., HY, X., WH, L., D, L., & J, L. (2020). Metformin Treatment Was  
355 Associated with Decreased Mortality in COVID-19 Patients with Diabetes in a Retrospective  
356 Analysis. *The American Journal of Tropical Medicine and Hygiene*, 103(1), 69–72.  
357 <https://doi.org/10.4269/AJTMH.20-0375>
- 358 Pereira-Dutra, F. S., Teixeira, L., Costa, M. F. de S., & Bozza, P. T. (2019). Fat, fight, and beyond:  
359 The multiple roles of lipid droplets in infections and inflammation. *Journal of Leukocyte Biology*,  
360 106(3), 563–580. <https://doi.org/10.1002/JLB.4MR0119-035R>
- 361 Pernicova, I., & Korbonits, M. (2014). Metformin—mode of action and clinical implications for diabetes  
362 and cancer. *Nature Reviews Endocrinology* 2014 10:3, 10(3), 143–156.  
363 <https://doi.org/10.1038/nrendo.2013.256>

- 364 Rena, G., Hardie, D. G., & Pearson, E. R. (2017). The mechanisms of action of metformin.  
365 *Diabetologia*, 60(9), 1577–1585. <https://doi.org/10.1007/s00125-017-4342-z>
- 366 Sanyaolu, A., Okorie, C., Marinkovic, A., Patidar, R., Younis, K., Desai, P., Hosein, Z., Padda, I.,  
367 Mangat, J., & Altaf, M. (2020). Comorbidity and its Impact on Patients with COVID-19. *Sn*  
368 *Comprehensive Clinical Medicine*, 2(8), 1. <https://doi.org/10.1007/S42399-020-00363-4>
- 369 Schneider, C. A., Rasband, W. S., & Eliceiri, K. W. (2012). NIH Image to ImageJ: 25 years of image  
370 analysis. *Nature Methods* 2012 9:7, 9(7), 671–675. <https://doi.org/10.1038/nmeth.2089>
- 371 Zangiabadian, M., Nejadghaderi, S. A., Zahmatkesh, M. M., Hajikhani, B., Mirsaeidi, M., & Nasiri, M.  
372 J. (2021). The Efficacy and Potential Mechanisms of Metformin in the Treatment of COVID-19 in  
373 the Diabetics: A Systematic Review. *Frontiers in Endocrinology*, 12(March), 1–9.  
374 <https://doi.org/10.3389/fendo.2021.645194>
- 375 Zhou, G., Myers, R., Li, Y., Chen, Y., Shen, X., Fenyk-Melody, J., Wu, M., Ventre, J., Doebber, T.,  
376 Fujii, N., Musi, N., Hirshman, M. F., Goodyear, L. J., & Moller, D. E. (2001). Role of AMP-  
377 activated protein kinase in mechanism of metformin action. *The Journal of Clinical Investigation*,  
378 108(8), 1167–1174. <https://doi.org/10.1172/JCI13505>

379

## 380 LEGENDS

381 **Figure 1. SARS-COV-2 infection induces AMPK phosphorylation and**  
382 **metformin treatment inhibits SARS-CoV-2. (A)** Immunoblots analyzing the  
383 phosphorylation of AMPK in SARS-CoV-2 infected Caco2 cells for early (1, 2, 6, and  
384 12 h) and late (24, 48, 72, and 96 h) time points. Cells infected with 1 MOI of SARS-  
385 CoV-2 were harvested at various time intervals post-infection and analyzed by  
386 immunoblotting. **(B)** Quantitative representation of AMPK phosphorylation from three  
387 independent replicates. Densitometric values of p-AMPK bands were normalized  
388 against those of T-AMPK and GAPDH belonging to the corresponding samples and  
389 the values were plotted graphically. **(C-H)** Pre-treatment with metformin suppresses



390 SARS-CoV-2 infection in Caco2 cells. **(C)** Schematic of the experimental set up for  
391 pre-treatment. Cells were infected with SARS-CoV-2 24 h after metformin treatment.  
392 The vehicle control cells were also infected with the virus in parallel. **(D)**  
393 Immunoblots confirming AMPK phosphorylation by metformin or vehicle treatment  
394 and SARS-CoV-2 infection. **(E)** Densitometric quantification of AMPK  
395 phosphorylation in infected cells. **(F)** SARS-CoV-2 RNA levels in the supernatant of  
396 metformin treated samples, measured by qRT-PCR of E gene. Relative fold change  
397 in the E levels between metformin and vehicle treated samples is depicted. **(G)**  
398 Relative fold change in the infectious viral titers of SARS-CoV-2 in metformin treated  
399 samples compared against that treated with vehicle, represented as fold change in  
400 PFU/mL. **(H)** Densitometric analysis of N expression during metformin treatment.

401 **Figure 2. AMPK activation is beneficial to the host against SARS-CoV-2. (A)**  
402 Schematic of the treatment of Caco2 cells with AICAR and infection by SARS-CoV-  
403 2. **(B)** Immunoblot confirming the infection. **(C)** Relative infectious titers of SARS-  
404 CoV-2 in samples that underwent pre-treatment with AICAR, as against the vehicle.  
405 **(D)** Schematic of the treatment of SARS-CoV-2 infected Caco2 cells with CC. **(E)**  
406 Immunoblot confirmation of the infection and inhibition of AMPK activity. **(F)**  
407 Quantification of AMPK phosphorylation in CC treated, infected samples. **(G)**  
408 Relative infectious titers of SARS-CoV-2 in samples that underwent CC-treatment,  
409 as against the vehicle, DMSO. **(H)** Relative expression of N in SARS-CoV-2 infected  
410 cells treated with CC or DMSO, quantified from densitometric values.

411 **Figure 3. Metformin suppresses SARS-CoV-2 replication in the infected cells.**  
412 **(A)** Schematic of the post-infection treatment by metformin. **(B)** Confirmation of  
413 SARS-CoV-2 infection and AMPK phosphorylation by immunoblotting. **(C)**  
414 Densitometric analysis of AMPK phosphorylation in the treated, infected cells. **(D)**

415 Relative fold change in SARS-CoV-2 E gene measured by qRT-PCR in the  
416 supernatants of metformin treated cells compared with the those treated with vehicle.  
417 **(E)** Relative SARS-CoV-2 infectious titers of the supernatant from samples treated  
418 with metformin represented as fold change in PFU/mL. **(F)** Relative abundance of N  
419 levels in the metformin treated samples against the control.

420 **Figure 4. Metformin treatment inhibits SARS-CoV-2 replication in a dose-**  
421 **dependent manner. (A)** Immunoblots confirming the infection and AMPK  
422 phosphorylation following the treatment of SARS-CoV-2 infected cells with metformin  
423 at the doses described above the panel. **(B)** Relative AMPK phosphorylation in the  
424 samples treated with metformin. The graph was generated from the densitometric  
425 analysis of the immunoblots. **(C)** Relative fold change in SARS-CoV-2 E gene  
426 measured by qRT-PCR in the supernatants of metformin treated cells compared with  
427 the those treated with vehicle. **(D)** Relative SARS-CoV-2 infectious titers of the  
428 supernatant from samples treated with metformin represented as fold change in  
429 PFU/mL. **(E)** Relative abundance of N quantified from the immunoblots from the  
430 panel (A). **(F)** Calculation of IC<sub>50</sub> and IC<sub>90</sub> for metformin on SARS-CoV-2 replication  
431 measured by plotting E gene levels present in the supernatants of the samples  
432 treated with the respective concentrations of metformin. **(G)** Measurement of TCID<sub>50</sub>  
433 and TCID<sub>90</sub> for metformin on SARS-CoV-2 infectious virus particle production.  
434 PFU/mL data for the individual samples treated with the specific concentrations were  
435 plotted in the graph to calculate the respective values. **(H)** Analysis of cell viability in  
436 the metformin-treated or the control cells by MTT assay. % viability of cells from  
437 absorbance measurements at 570 and 620 nm relative to the respective vehicle  
438 control are plotted graphically.

439

440 FIGURES

441 Figure 1

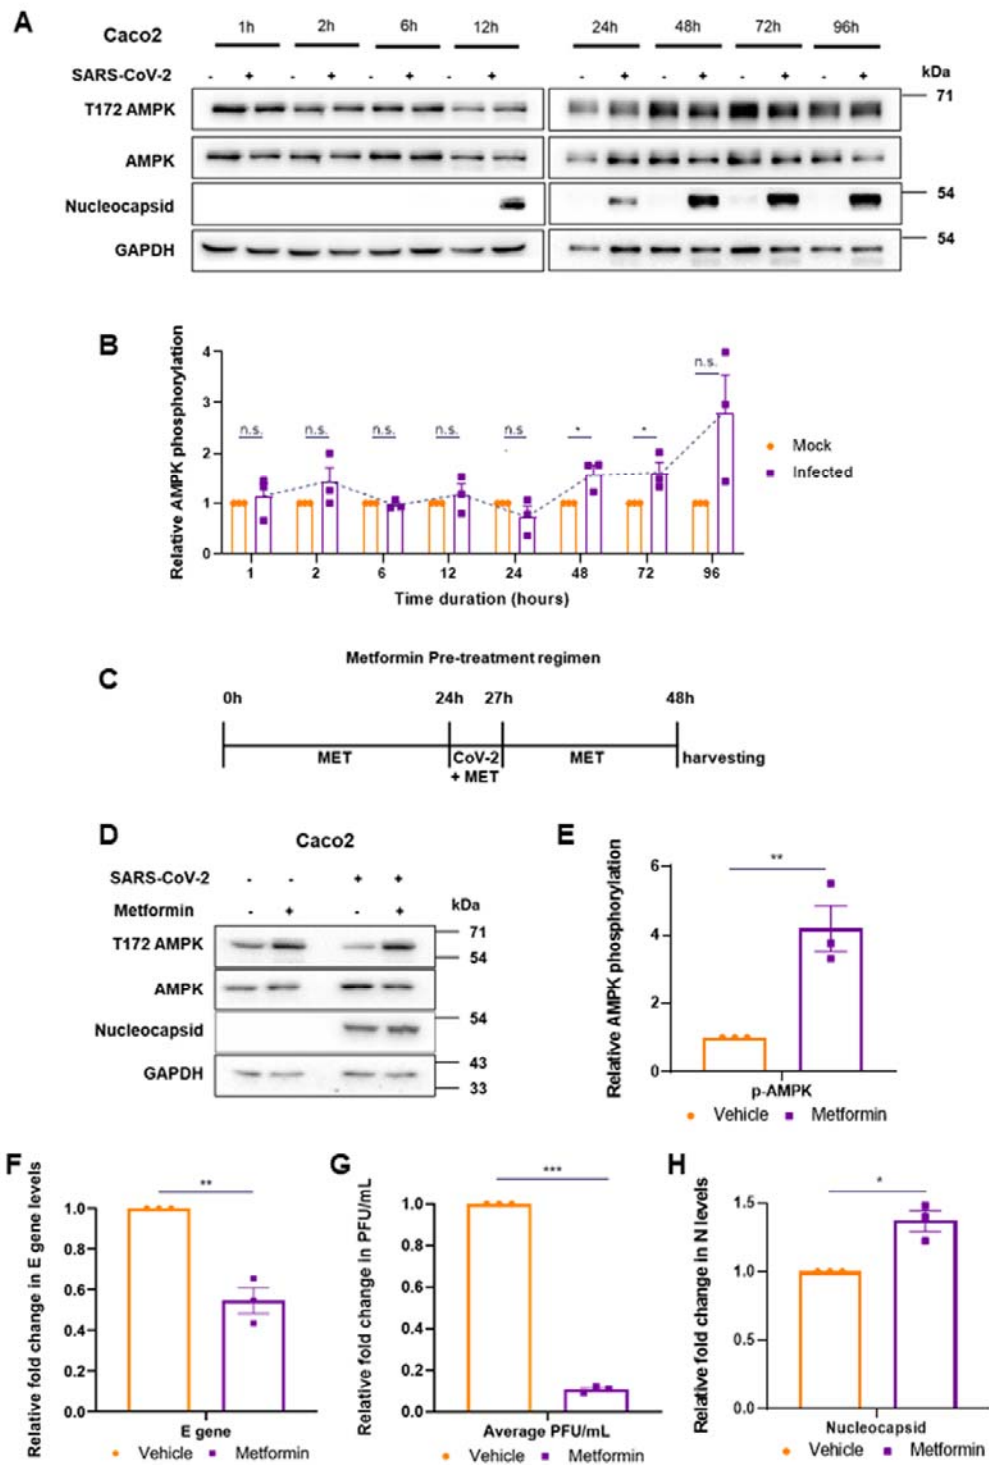

442

443 **Figure 2**

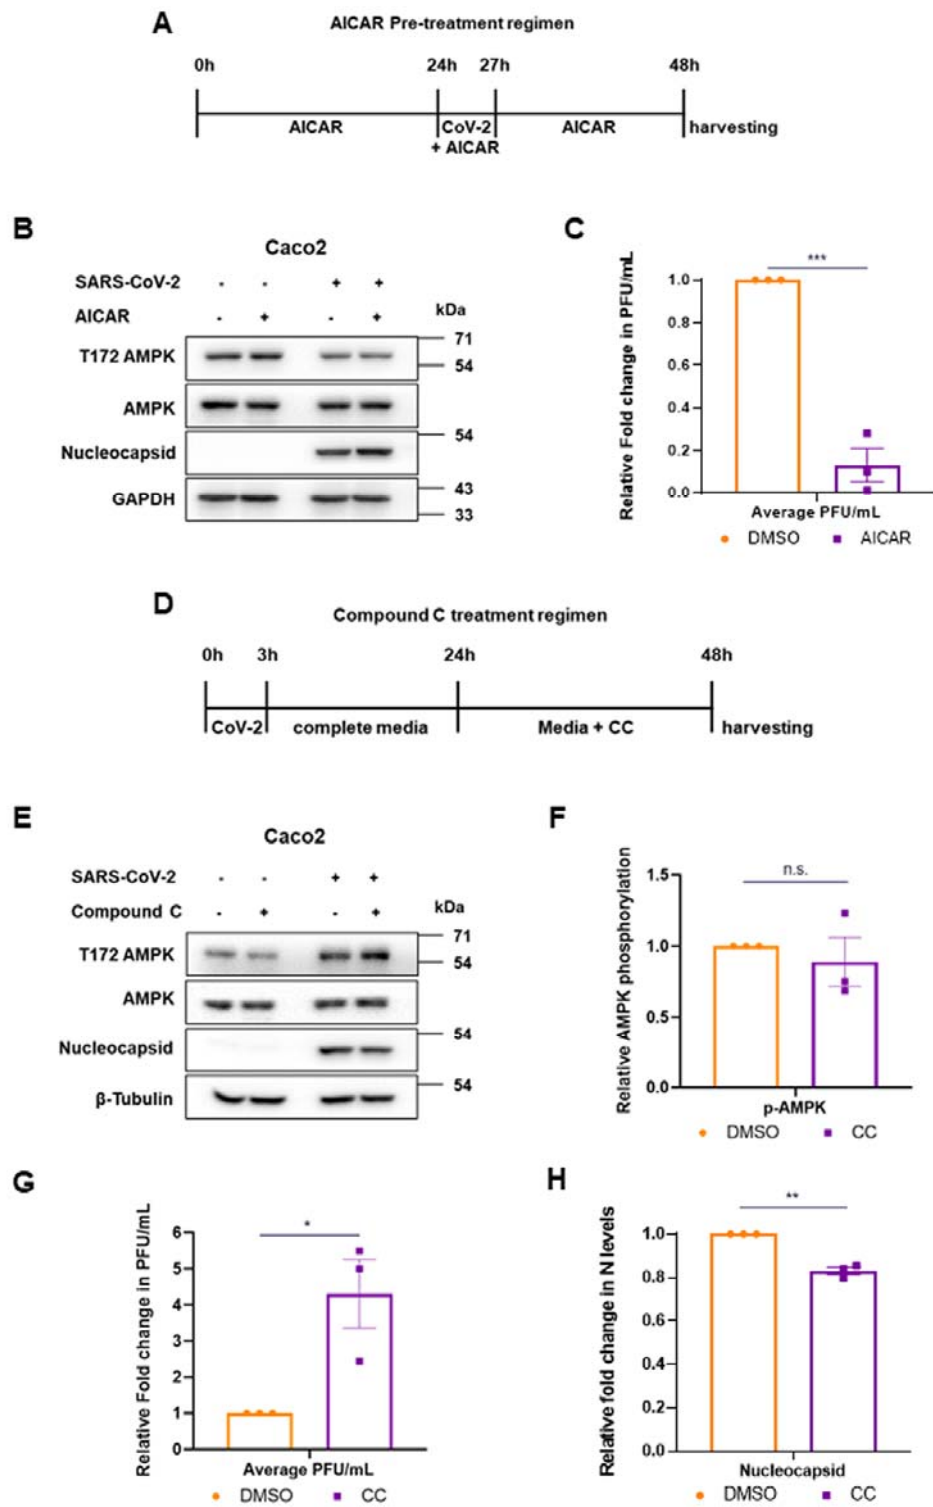

444

445 **Figure 3**

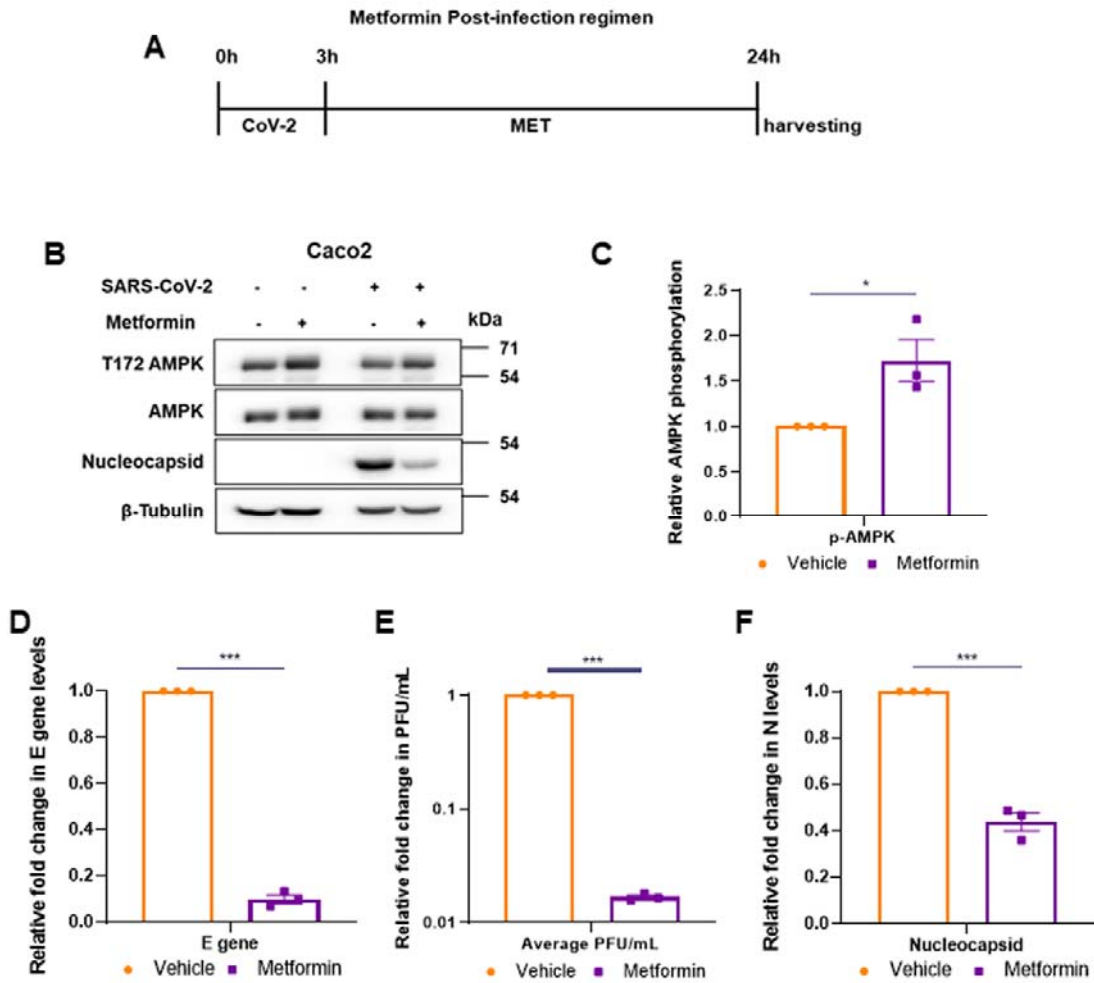

446

447

448

449

450

451

452 **Figure 4**

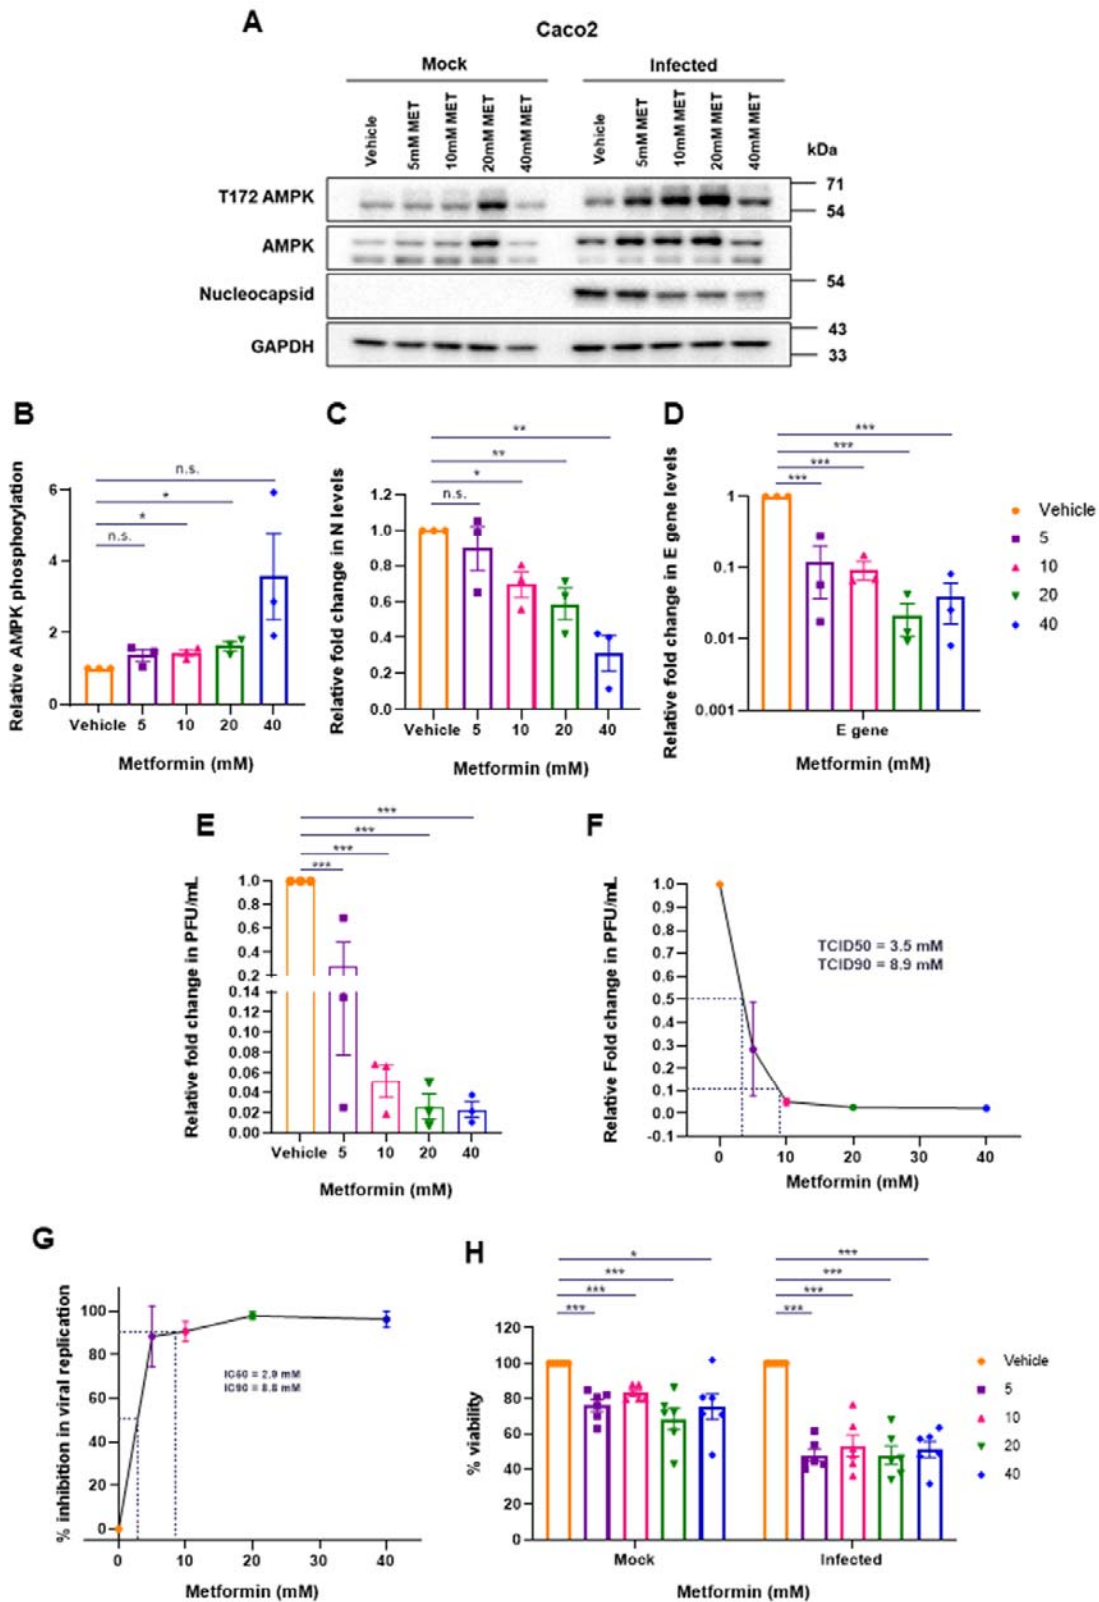

453

454 **Supplementary figures**

455 **Figure S1**

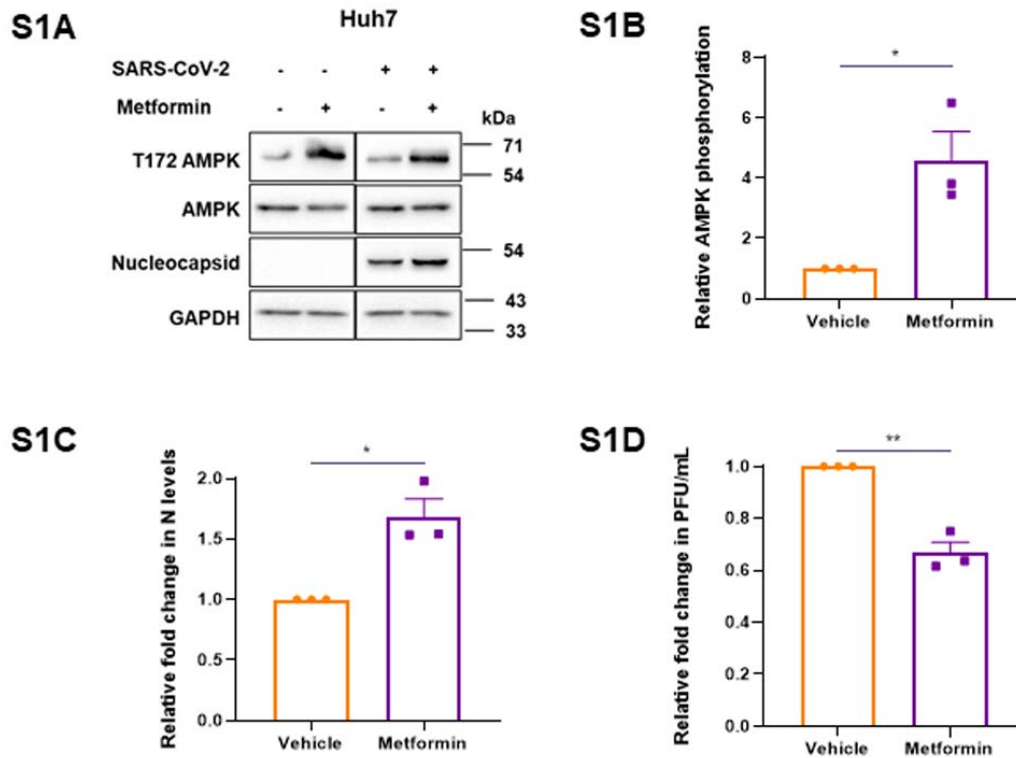

456

457

458 **Figure S1.** Metformin treatment reduces SARS-CoV-2 infection in Huh7 cells. **(A)**  
459 Immunoblotting of the metformin treated or control samples to confirm SARS-CoV-2  
460 infection and AMPK phosphorylation. Huh7 cells were treated with metformin and  
461 infected with SARS-CoV-2 as demonstrated in Figure 1D and the samples  
462 processed as in Figure 1E. **(B)** Densitometric quantification of AMPK  
463 phosphorylation and **(C)** that of N abundance in metformin treated or control  
464 samples. **(D)** Relative infectious titer of SARS-CoV-2 in the supernatants of  
465 metformin treated samples or the control samples.

466 **Figure S2**

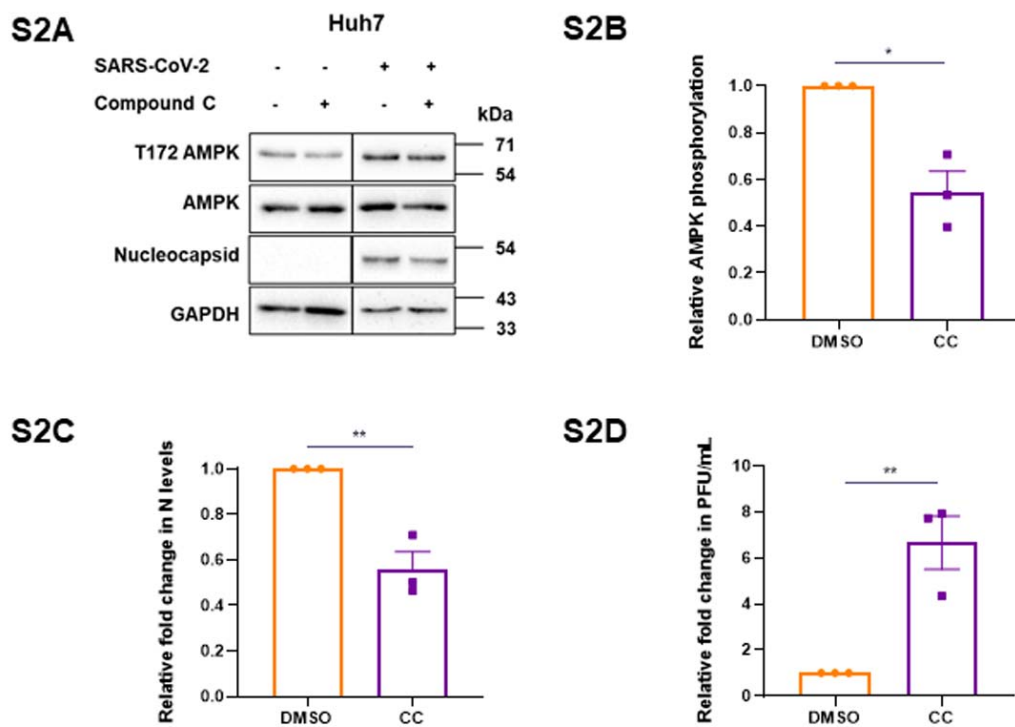

467

468 **Figure S2.** AMPK inhibition promotes SARS-CoV-2 titers. **(A)** Confirmation of  
469 SARS-CoV-2 infection in Huh7 cells by immunoblotting. **(B)** Relative AMPK  
470 phosphorylation levels in samples treated with CC or the control samples. **(C)**  
471 Relative abundance of N in the control samples or those treated with CC. **(D)**  
472 Relative infectious titers in the control or CC-treated samples represented as relative  
473 PFU/mL.

474

475

476

477



478 **Figure S3**

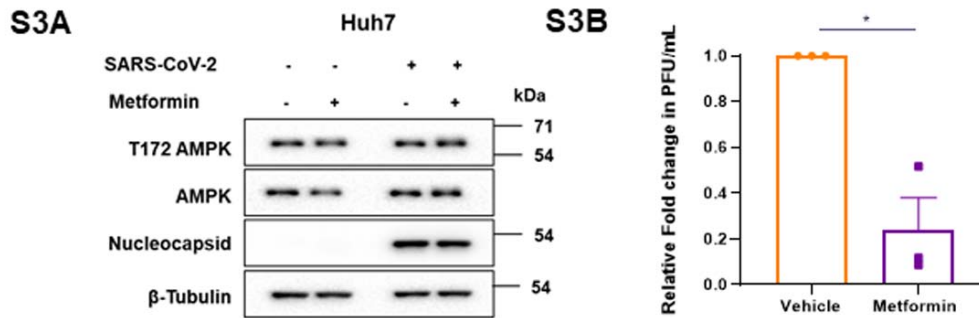

479

480 **Figure S3.** Metformin inhibits SARS-Cov-2 replication in the infected Huh7 cells. **(A)**

481 Immunoblotting of SARS-Cov-2 infected Huh7 cultures treated with metformin

482 compared with the control samples. The cells were first infected with the virus and

483 followed by metformin treatment as described in Figure 3A. **(B)** Relative infectious

484 titer of SARS-Cov-2 from the control samples or those treated with metformin.
